# Supplementary material for: Screening for α-Glucosidase-Inhibiting Saponins from Pressurized Hot Water Extracts of Quinoa Husks
Source: MDPI journal article supplement (doi:10.3390/foods11193026), 2022-09-29
Supplement: s1 [file s1]

**Table S1.** The response surface analysis of variance (ANOVA).

| Source                | Sum of Source | df | Mean Source | F-value | P-value |
|-----------------------|---------------|----|-------------|---------|---------|
| Model                 | 62.93         | 9  | 6.99        | 52.48   | 0.0001  |
| <i>A</i> -Flow Rate   | 1.89          | 1  | 1.89        | 14.17   | 0.0070  |
| <i>B</i> -Temperature | 10.72         | 1  | 10.72       | 80.45   | 0.0001  |
| <i>C</i> -Time        | 0.032         | 1  | 0.032       | 0.24    | 0.6390  |
| AB                    | 4.09          | 1  | 4.09        | 30.70   | 0.0009  |
| AC                    | 2.12          | 1  | 2.12        | 15.88   | 0.0053  |
| BC                    | 2.70          | 1  | 2.70        | 20.30   | 0.0028  |
| <i>A</i> <sup>2</sup> | 0.34          | 1  | 0.34        | 2.57    | 0.1531  |
| <i>B</i> <sup>2</sup> | 29.78         | 1  | 29.78       | 223.53  | 0.0001  |
| <i>C</i> <sup>2</sup> | 13.09         | 1  | 13.09       | 98.23   | 0.0001  |
| Residual              | 0.93          | 7  | 0.13        |         |         |
| <i>Lack of Fit</i>    | 0.40          | 3  | 0.13        | 1.00    | 0.4792  |
| <i>Error</i>          | 0.53          | 4  | 0.13        |         |         |
| Cor Total             | 63.87         | 16 |             |         |         |

**Table S2.** Affinity values of compounds 1-23 and acarbose with  $\alpha$ -glucosidase.

| Compounds number | Affinity (kcal/mol) | Compounds number | Affinity (kcal/mol) |
|------------------|---------------------|------------------|---------------------|
| 1                | -8.6                | 13               | -8.3                |
| 2                | -8.1                | 14               | -12.6               |
| 3                | -9.7                | 15               | -7.2                |
| 4                | -9.4                | 16               | -12.2               |
| 5                | -7.1                | 17               | -8.7                |
| 6                | -9.3                | 18               | -8.6                |
| 7                | -9.4                | 19               | -12.7               |
| 8                | -8.9                | 20               | -8.7                |
| 9                | -11.6               | 21               | -12.6               |
| 10               | -8.3                | 22               | -9.2                |
| 11               | -9.4                | 23               | -9.4                |
| 12               | -7.7                | acarbose         | -8.5                |
